# Supplementary material for: Fifty years of the Journal of Perinatal Medicine: an altmetric and bibliometric study
Source: publisher site journal article supplement (doi:10.1515/jpm-2022-0461), 2022-10-28
Supplement: Supplementary file 1 [file j_jpm-2022-0461_suppl.docx]

**Supplemental Table 1**

**The most influential articles published in the *Journal of Perinatal Medicine***

**by three metrics of research influence, 1973-2022**

| **Top-Cited** | **Top-RCR** | **Top-AAS** | **Article Title** | **Year** | **Cites** | **RCR** | **AAS** |
| --- | --- | --- | --- | --- | --- | --- | --- |
| 1 | 4 | 3 | The roles of long-chain polyunsaturated fatty acids in pregnancy, lactation and infancy: review of current knowledge and consensus recommendations | 2008 | 520 | 13.91 | 73 |
| 2 | 2 |  | Normal values of pulsatility index from fetal vessels – a cross sectional study on 1556 healthy fetuses | 1990 | 420 | 16.84 |  |
| 3 | 12 |  | Placental lesions associated with maternal underperfusion are more frequent in early-onset than in late-onset preeclampsia | 2011 | 196 | 7.5 | 4 |
| 4 | 16 |  | Listeriosis in human pregnancy: a systematic review | 2011 | 178 | 5.72 | 11 |
| 5 | 32 |  | Markers of risk for preterm delivery | 1999 | 158 | 4.44 | 3 |
| 6 | 11 |  | Psychosocial stress in pregnancy and preterm birth: associations and mechanisms | 2013 | 158 | 7.77 | 1 |
| 7 | 13 |  | System 8000 – computerized antenatal FRH analysis | 1991 | 153 | 6.84 |  |
| 8 | 31 |  | TNF, IL-1, IL-6, IL-8 and soluble TNF receptors in relation to chorioamnionitis and premature labor | 1998 | 152 | 4.47 |  |
| 9 | 9 |  | Clinical chorioamnionitis at term I: microbiology of the amniotic cavity using cultivation and molecular techniques | 2015 | 147 | 7.99 | 3 |
| 10 | 27 |  | A sonographic short cervix as the only clinical manifestation of intra-amniotic infection | 2006 | 145 | 4.59 |  |
| 11 | 25 |  | Intrauterine restriction (IUGR) | 2008 | 143 | 4.62 |  |
| 12 |  |  | Cerebral palsy and fetal inflammatory response syndrome: a review | 2006 | 135 | 3.39 | 0 |
| 13 | 17 |  | Fetal growth restriction - from observation to intervention | 2010 | 132 | 5.46 |  |
| 14 |  |  | Multifactorial study of risk of prematurity at 32 weeks of gestation. 1. Study of frequency of 30 predictive characteristics | 1974 | 130 |  | 7 |
| 15 |  |  | Genes and the preeclampsia a syndrome | 2008 | 130 | 3.43 |  |
| 16 |  |  | Characterization of the myometrial transcriptome and biological pathways of spontaneous human labor at term | 2010 | 121 | 3.49 | 3 |
| 17 |  |  | Monitoring the fetal heart non-invasively: a review of methods | 2001 | 117 | 3.39 |  |
| 18 |  |  | Maturation of the autonomic nervous system: differences in heart rate variability in premature vs. term infants | 2006 | 117 | 3.59 |  |
| 19 |  |  | Epigenetic malprogramming of the insulin receptor promoter due to developmental overfeeding | 2010 | 117 | 3.01 |  |
| 20 | 6 | 33 | Mid-trimester preterm premature rupture of membranes (PPROM): etiology, diagnosis, classification, international recommendations of treatment options and outcome | 2018 | 116 | 9.58 | 13 |
| 21 |  |  | Optimization of human milk fortification for preterm infants: new concepts and recommendations | 2010 | 114 | 4.38 | 3 |
| 22 |  |  | Detection of ureaplasmas by the polymerase chain reaction in the amniotic fluid of patients with cervical insufficiency | 2010 | 114 | 3.97 | 6 |
| 23 |  |  | Is treatment with vaginal pessaries an option in patients with a sonographically detected short cervix? | 2003 | 113 | 3.36 |  |
| 24 |  |  | A kick from within - fetal movement counting and the cancelled progress in antenatal care | 2004 | 112 | 3.49 |  |
| 25 | 21 |  | Midtrimester amniotic fluid concentrations of interleukin-6 and interferon-gamma-inducible protein-10: evidence for heterogeneity of intra-amniotic inflammation and associations with spontaneous early (< 32 weeks) and late (> 32 weeks) preterm delivery | 2012 | 112 | 5.04 |  |
| 26 |  |  | Fetal congestive heart failure: correlation of Tei-Index and Cardiovascular-Score | 2001 | 111 | 3.22 |  |
| 27 |  | 5 | Normal and abnormal transformation of the spiral arteries during pregnancy | 2006 | 109 | 3.16 | 61 |
| 28 |  |  | European consensus guidelines on the management of neonatal respiratory distress syndrome | 2007 | 109 | 2.53 | 9 |
| 29 |  |  | Ultrasonographic fetal weight estimation: accuracy of formulas and accuracy of examiners by birth weight from 500 to 5000 g | 2004 | 107 | 3.2 |  |
| 30 |  |  | MMP/TIMP imbalance in amniotic fluid during PROM: an indirect support for endogenous pathway to membrane rupture | 1999 | 105 | 3.02 |  |
| 31 |  |  | Changes in the cervical extracellular matrix during pregnancy and parturition | 1999 | 105 | 2.68 | 0 |
| 32 |  |  | Perinatal brain injury | 2000 | 105 | 2.12 | 3 |
| 33 |  |  | Perinatal outcomes and the use of oral hypoglycemic agents | 2005 | 105 | 2.69 | 0 |
| 34 |  |  | Bedside functional imaging of the premature infant brain during passive motor activation | 2001 | 100 | 2.33 |  |
|  |  | 1 | Outcomes from birth to 6 months of publicly insured infants born to mothers with severe acute respiratory syndrome coronavirus 2 infection in the United States | 2022 | 0 | 0 | 405 |
|  | 5 | 2 | Risk factors associated with adverse fetal outcomes in pregnancies affected by Coronavirus disease 2019 (COVID-19): a secondary analysis of the WAPM study on COVID-19 | 2020 | 67 | 9.93 | 154 |
|  |  | 4 | Complete spontaneous resolution of severe nonimmunological hydrops fetalis with unknown etiology in the second trimester - a case report | 2002 | 13 | 0.21 | 66 |
|  |  | 6 | Underlying causes of neonatal deaths in term singleton pregnancies: home births versus hospital births in the United States | 2017 | 7 | 0.44 | 55 |
|  |  | 7 | The impact of psychological distress during pregnancy on the developing fetus: biological mechanisms and the potential benefits of mindfulness interventions | 2017 | 22 | 1.65 | 46 |
|  |  | 8 | Women with high plasma levels of PBDE-47 are at increased risk of preterm birth | 2021 | 2 | 0 | 46 |
|  |  | 9 | Iron supplementation in pregnancy | 2003 | 29 | 0.67 | 35 |
|  |  | 10 | Presence of human milk bank is associated with elevated rate of exclusive breastfeeding in VLBW infants | 2013 | 67 | 3.44 | 34 |
|  |  | 11 | The relation between cigarette smoking with delivery outcomes. An evaluation of a database of more than nine million deliveries | 2022 | 1 | 0 | 31 |
|  | 14 | 12 | Evidence that intra-amniotic infections are often the result of an ascending invasion - a molecular microbiological study | 2019 | 64 | 6.83 | 30 |
|  |  | 13 | Physical exercise in pregnancy: benefits, risks and prescription | 2022 | 8 | 2.77 | 29 |
|  |  | 14 | First trimester beta-hCG and estradiol levels in singleton and twin pregnancies after assisted reproduction | 2018 | 2 | 0.33 | 28 |
|  |  | 15 | Pregnancy in incarcerated women: need for national legislation to standardize care | 2021 | 0 | 0 | 28 |
|  |  | 16 | Professionally responsible counseling about birth location during the COVID-19 pandemic | 2020 | 10 | 2.32 | 27 |
|  |  | 17 | Intrapartal fetal decapitation after shoulder dystocia - a forensically acceptable or unacceptable complication? | 2022 | 0 | 0 | 27 |
|  |  | 18 | Taurine and taurine-deficiency in the perinatal period | 2002 | 83 | 1.83 | 26 |
|  |  | 19 | Premature rupture of membranes at term in low risk women: how long should we wait in the latent phase? | 2014 | 10 | 0.6 | 23 |
|  |  | 20 | Survival and major disability rate in infant born at 22-25 weeks of gestation | 2009 | 13 | 0.39 | 21 |
|  |  | 21 | Preterm labor and bacterial vaginosis-associated bacteria among urban women | 2009 | 34 | 1.13 | 20 |
|  |  | 22 | Limit of viability in Japan: ethical consideration | 2009 | 14 | 0.36 | 19 |
|  |  | 23 | Prenatal and perinatal risk factors for autism | 1999 | 95 | 2.47 | 18 |
|  |  | 24 | Out-of-hospital births in the United States 2009-2014 | 2016 | 13 | 0.91 | 18 |
|  |  | 25 | Is 5-methyltetrahydrofolate an alternative to folic acid for the prevention of neural tube defects? | 2013 | 52 | 1.95 | 17 |
|  |  | 26 | Waterbirths compared with landbirths: an observational study of nine years | 2004 | 62 | 1.82 | 17 |
|  |  | 27 | The use of antenatal corticosteroids for fetal maturation: clinical practice guideline by the WAPM-World Association of Perinatal Medicine and the PMF-Perinatal Medicine foundation | 2022 | 3 | 0 | 17 |
|  |  | 28 | Risk factors of uterine rupture with a special interest to uterine fundal pressure | 2017 | 23 | 2.05 | 16 |
|  |  | 29 | The effect of attending a prenatal childbirth preparedness course on labor duration and outcomes | 2018 | 6 | 0.92 | 14 |
|  |  | 30 | Academic tweeting in #ObGyn. Where do we stand? | 2019 | 2 | 0.49 | 14 |
|  |  | 31 | Guttus, tiralatte and teterelle: a history of breast pumps | 2012 | 12 | 0.31 | 14 |
|  |  | 32 | Music devices for the fetus? An evaluation of pregnancy music belts | 2016 | 5 | 0.29 | 14 |
|  |  | 34 | How useful is 3D and 4D ultrasound in perinatal medicine? | 2007 | 43 | 1.65 | 13 |
|  | 28 |  | Tokophobia (fear of childbirth): prevalence and risk factors | 2018 | 36 | 4.51 | 9 |
|  | 30 |  | The potential of 4D sonography in the assessment of fetal neurobehavior - multicentric study in high-risk pregnancies | 2010 | 33 | 4.48 | 8 |
|  | 33 |  | Mycoplasma/Ureaplasma infection in pregnancy: to screen or not to screen | 2017 | 58 | 4.42 | 7 |
|  | 3 |  | Anxiety and depression symptoms in the same pregnant women before and during the COVID-19 pandemic | 2020 | 62 | 15.03 | 6 |
|  | 15 |  | COVID-19 during pregnancy: an overview of maternal characteristics, clinical symptoms, maternal and neonatal outcomes of 10,996 cases described in 15 countries | 2020 | 41 | 6.18 | 3 |
|  | 18 |  | The care of pregnant women during the COVID-19 pandemic - response of a large health system in metropolitan New York | 2020 | 17 | 5.4 | 3 |
|  | 23 |  | Early postpartum discharge during the COVID-19 pandemic | 2020 | 20 | 4.82 | 3 |
|  | 1 |  | Effects of coronavirus 19 pandemic on maternal anxiety during pregnancy: a prospectic observational study | 2020 | 87 | 19.25 | 2 |
|  | 8 |  | The impact of the COVID-19 pandemic on the perinatal mental health of women | 2020 | 30 | 8.29 | 2 |
|  | 10 |  | The frequency and type of placental histologic lesions in term pregnancies with normal outcome | 2018 | 81 | 7.92 | 1 |
|  | 19 |  | Clinical chorioamnionitis at term II: the intra-amniotic inflammatory response | 2016 | 75 | 5.2 | 1 |
|  | 7 |  | COVID-19 vaccine hesitancy in perinatal women: a cross sectional survey | 2021 | 22 | 9 |  |
|  | 20 |  | Comparison between antenatal neurodevelopmental test and fetal Doppler in the assessment of fetal well being | 2013 | 16 | 5.12 |  |
|  | 22 |  | Further study of the inhibition of premature labor by indomethacin. 2. Double blind study | 1984 | 89 | 4.86 |  |
|  | 24 |  | Diagnosis and assessment of fetal malformations and abnormalities by ultrasound | 1980 | 51 | 4.79 |  |
|  | 26 |  | Development of an ultrasonic system for 3-dimensional reconstruction of the fetus | 1989 | 88 | 4.6 |  |
|  | 29 |  | Ultrasound measurements of umbilical blood-flow in normal and complicated pregnancies | 1982 | 56 | 4.48 |  |
|  | 34 |  | Nonquantitative estimation of amniotic-fluid volume in suspected prolonged pregnancy | 1980 | 47 | 4.41 |  |
